# Supplementary material
Source: PubMed Central journal article supplement (PMC8047733)
Supplement: jamasurg-e210906-s001.pdf [file jamasurg-e210906-s001.pdf]

|    |                                                                                                                |          |
|----|----------------------------------------------------------------------------------------------------------------|----------|
| 1  | <b>Supplement</b>                                                                                              |          |
| 2  |                                                                                                                |          |
| 3  | <b>Statistical analysis plan</b>                                                                               |          |
| 4  |                                                                                                                |          |
| 5  | <b>Surgery or Functional Bracing for Humeral Shaft Fractures: Effect of Healing Problems Requiring</b>         |          |
| 6  | <b>Secondary Surgery After Initial Nonoperative Treatment – A Pre-Specified Secondary Analysis of the FISH</b> |          |
| 7  | <b>Randomized Clinical Trial</b>                                                                               |          |
| 8  |                                                                                                                |          |
| 9  | Lasse Rämö, Mika Paavola, Bakir O. Sumrein, Vesa Lepola, Tuomas Lähdeoja, Jonas Ranstam, Teppo                 |          |
| 10 | Järvinen and Simo Taimela on behalf of Finnish Shaft of the Humerus (FISH) Investigators                       |          |
| 11 |                                                                                                                |          |
| 12 |                                                                                                                |          |
| 13 | <b>This supplement contains the following items:</b>                                                           |          |
| 14 | <b>1. TRIAL REGISTRATION</b>                                                                                   | <b>2</b> |
| 15 | <b>1.1. Original registration</b>                                                                              | <b>2</b> |
| 16 | <b>1.2. Final registration – Amended Sections Only</b>                                                         | <b>4</b> |
| 17 | <b>1.3. Summary of Amendments</b>                                                                              | <b>4</b> |
| 18 | <b>2. PROTOCOL</b>                                                                                             | <b>5</b> |
| 19 | <b>3. STATISTICAL ANALYSIS PLAN – 1-YEAR RESULTS</b>                                                           | <b>6</b> |
| 20 | <b>3.1. Original Statistical Plan</b>                                                                          | <b>6</b> |
| 21 | <b>3.2. Blinded Data Interpretation Protocol</b>                                                               | <b>6</b> |
| 22 | <b>3.3. Statistical Analysis Plan – Amendments</b>                                                             | <b>7</b> |
| 23 | <b>4. STATISTICAL ANALYSIS PLAN – 2-YEAR RESULTS</b>                                                           | <b>8</b> |
| 24 | <b>4.1. Background</b>                                                                                         | <b>8</b> |
| 25 | <b>4.2. Statistical methods</b>                                                                                | <b>8</b> |
| 26 | <b>4.3. Implementation of Analysis Plan</b>                                                                    | <b>8</b> |
| 27 |                                                                                                                |          |
| 28 |                                                                                                                |          |

29 **1. TRIAL REGISTRATION**

30

31 **1.1. Original registration**

32

33 Original trial registration submitted to Clinical Trials.gov on October 30, 2012 can be accessed at:

34 [https://clinicaltrials.gov/ct2/history/NCT01719887?V\\_1=View#StudyPageTop](https://clinicaltrials.gov/ct2/history/NCT01719887?V_1=View#StudyPageTop)

35

36 This registration with relevant information is copied below:

37 Study Start: October 2012 (first patient recruited November 4, 2012)

38 First Submitted: October 28, 2012 (at clinicaltrials.gov)

39

40 **Brief Summary**

41

42 Humeral shaft fractures represent 1-3% of all fractures and 20% of the humeral fractures. These fractures have  
43 historically been treated mainly conservatively with good results. Recent development in fracture treatment and  
44 findings that certain fracture types are more prone to non-union and bracing-related functional problems of adjacent  
45 joints are somewhat common have caused increasing interest in treating these fractures surgically. Return to activities  
46 is also considered to be quicker among surgically treated patients.

47

48 The purpose of this study is to evaluate effectiveness and cost-effectiveness of surgical treatment of humeral shaft  
49 fractures. Patients with a unilateral humeral shaft fracture who are willing to participate in the study after informed  
50 consent are randomly assigned to two different treatment methods:

51

52 Surgical treatment with an open reduction and internal fixation with a 4,5mm locking plate.

53 Conservative treatment with functional bracing

54

55 The randomization is done using blocked randomization (block sizes are not known by the enrolling or assigning  
56 physician) and stratification is done according to fracture type (AO-OTA type A vs. type B/C) and radial nerve status  
57 (total/subtotal motor palsy vs. no palsy).

58

59 Standard follow-up visits at 6 weeks, 3, 6 and 12 months are arranged. Later follow-up visits are arranged at 2, 5 and  
60 10 years for the study purpose. Patients fill evaluation forms and clinical and radiological assessments are made. The  
61 physiotherapist doing objective functional measurements is blinded to treatment method. Both study groups receive  
62 physiotherapy after the initial treatment.

63

64 **Study Design**

65 **Study Type:** Interventional

66 **Interventional Study Model:** Parallel Assignment

67 **Number of Arms:** 2

68 **Masking:** Single Outcomes Assessor

69 **Allocation:** Randomized

70 **Enrollment:** 100 [Anticipated]

71

72 **Arms and Interventions**

73 **Active Comparator:** Conservative treatment

74 Conservative treatment with functional brace and physiotherapy.

75 Device: Conservative treatment

76 Conservative treatment with functional brace applied after 7 days of initial treatment with prefabricated cork splint.

77 Physiotherapy

78 Physiotherapy is arranged to both groups at 3 and 9 wks.

79 **Experimental:** Operative treatment

80 Operative treatment with open reduction and internal fixation with 4,5mm locking compression plate. Physiotherapy  
81 at 3 and 9 wks.

82 Procedure: Operative treatment

83 Operative treatment with open reduction and internal fixation using 4,5mm locking compression plate.

84 Physiotherapy

85 Physiotherapy is arranged to both groups at 3 and 9 wks.

86

## 87 **Outcome Measures**

88

89 Primary Outcome Measures:

90 1. Pain at rest and in activity, Change in Numerical Rating Scale (NRS) 0-10

91 at 6 wks, 3, 6, 12 mo, 2, 5, 10 years

92 2. Change in The Disabilities of the Arm, Shoulder and Hand Score (DASH)

93 at 6 wks, 3, 6, 12 mo, 2, 5, 10 years

94

95 Secondary Outcome Measures:

96 3. Subjective assessment of the function of the upper extremity

97 Numerical Rating Scale (NRS) 0-10 Subjective assessment of the function of the upper extremity

98 4. Constant Score

99 5. Elbow ROM

100 6. Health-related quality of life (15D)

101 7. Complications

102 Incidence of re-fracture, reoperation, infection and iatrogenic radial palsy is recorded and compared  
103 between study groups.

104 8. Union

105 Time to union, non-union, malunion Union

106 9. Cost-effectiveness

107 Quality-adjusted life years/months measured as a change in 15D tool, pain-NRS and other outcome  
108 measures. Cost-effectiveness

109 10. Subjective assessment of the function of the upper extremity

110 Likert Scale 1-7 Subjective assessment of the function of the upper extremity

111 11. Subjective assessment of the function of the elbow

112 Numerical Rating Scale (NRS) 0-10 Subjective assessment of the function of the elbow

113

## 114 **Eligibility**

115

### 116 **Inclusion Criteria:**

- 117 • Over 18 years old patient who agrees to the consent to participation in this study
- 118 • Unilateral dislocated humeral shaft fracture (dislocation over thickness of the bone cortex, fracture below the  
119 level of insertion of pectoralis major muscle and 5 cm above the olecranon fossa)
- 120 • Randomization can be done within 10 days and operation within 14 days after the initial trauma
- 121 • Patient is willing to participate all follow-up visits

122

### 123 **Exclusion Criteria:**

- 124 • Bilateral humeral shaft fracture
- 125 • A significant concomitant trauma of the same upper extremity that warrants operative treatment (fracture,  
126 tendon injury, soft tissue trauma)
- 127 • Other fracture or abdominal/thoracic trauma that warrants operative treatment

- 128 • Open fracture
- 129 • Pathological fracture
- 130 • Multi-trauma patient
- 131 • Vascular injury
- 132 • Plexus injury
- 133 • Previous trauma in the same upper extremity that causes functional deficit
- 134 • Trauma or condition that warrants use of walking aid (crutches, wheelchair etc.)
- 135 • Disease that affects significantly general condition of the patient
- 136 • Significantly impaired ability to co-operate for any reason (substance abuse, mental disorder, dementia)
- 137 • Unwilling to accept both treatment methods

### 1.2. Final registration – Amended Sections Only

The final protocol submitted to Clinical Trials.gov can be accessed at:  
<https://clinicaltrials.gov/ct2/show/NCT01719887>

**Enrollment:** ~~100~~ [Anticipated] 82 [Actual]

### Outcome Measures

Primary Outcome Measures:

1. ~~Pain at rest and in activity, Change in Numerical Rating Scale (NRS) 0-10 at 6 wks, 3, 6, 12 mo, 2, 5, 10 years~~
2. ~~Change in The Disabilities of the Arm, Shoulder and Hand Score (DASH) at 6 wks, 3, 6, 12 mo, 2, 5, 10 years months~~
1. The Disabilities of the Arm, Shoulder and Hand Score (DASH) at 12 months

Secondary Outcome Measures:

7. Complications  
Incidence of complications (i.e. non-union, malunion, re-fracture, reoperation, infection and iatrogenic radial palsy) is recorded and compared between study groups.
11. The Disabilities of the Arm, Shoulder and Hand Score (DASH) at 6 wks, 3, 6 mo, 2, 5, 10 years
12. Pain at rest and in activity, Numerical Rating Scale (NRS) 0-10 at 6 wks, 3, 6 mo, 12 mo, 2, 5, 10 years
13. Percentage of patients with acceptable symptom state (PASS)

### 1.3. Summary of Amendments

*Primary and secondary outcomes*

- Pain at rest and activities downgraded as secondary outcomes
- DASH at 12 months specified as the single primary outcome and other time points downgraded to secondary outcomes

When we registered the trial in ClinicalTrials.gov, our primary outcome measures were the pain at rest and activities at 6 weeks, 3 months, 6 months and 12 months as well as change in DASH at 6 weeks, 3 months, 6 months and 12 months. The secondary outcomes were as listed above in the original protocol. After discussing within the study group about the complexity of having several outcome measures at different time points we first decided to downgrade other time points than 12 months to secondary outcomes (the change was sent to clinicaltrials.gov on January 23,

178 2013) and later on we made a decision to have only one primary outcome, DASH at 12 months, since this instrument  
179 contains also questions regarding pain at rest and at activities. The change was made to clinicaltrials.gov on August 19,  
180 2016.

181  
182 - Percentage of patients with acceptable symptom state (PASS)

183  
184 We added this secondary outcome when preparing our protocol publication in the spring 2017 and it was added to  
185 clinicaltrials.gov on May 28, 2017. We felt it would add value to our list of secondary outcomes if we define PASS of  
186 DASH score in our study population and define which part of the study group has achieved this at different time  
187 points.

188  
189 *Enrollment*

190  
191 - Enrollment from 100 [anticipated] to 82 [actual]

192  
193 When we first registered the study, we reported the enrollment to be 100 patients. We had done the power analysis  
194 which showed 35 patients per group and we decided to have 12,5% lost to follow-up reservation. When we sent our  
195 study protocol to the ethical board of Helsinki and Uusimaa Hospital District, we put the correct value of 80 patients  
196 to the target field. We first registered the enrollment target to 100 patients and after noticing this mistake we made  
197 the correction to clinicaltrials.gov on May 28, 2017 when we unified the registered protocol between clinicaltrials.gov  
198 and the accepted protocol paper<sup>1</sup>. The number of enrolled patients became 82 since the enrollment took place in two  
199 separate units and we were unable to stop the recruiting exactly at 80 patients. After noticing we had achieved the  
200 target, we stopped the enrollment on January 2018.

201  
202 Be it noticed here that all the above noted amendments to the original protocol were made prior to completion of the  
203 trial and before doing any data analysis and prior revealing the allocations of the study groups.

204  
205  
206

## 207 **2. PROTOCOL**

208  
209 The final study/trial protocol was published in the BMJ Open (Rämö et al<sup>1</sup>)

210  
211

212 **3. STATISTICAL ANALYSIS PLAN – 1-YEAR RESULTS**

213

214 **3.1. Original Statistical Plan**

215

216 A description of our original statistical analysis plan was published<sup>1</sup> as follows:

217

218 The data will be analyzed using IBM SPSS Statistics V.23 or higher. The results will be reported following the  
219 Consolidated Standards of Reporting Trials statement.

220

221 The baseline characteristics of the participants will be summarized by group, reported as a mean (SD)  
222 or median (first quartile, third quartile) for continuous variables, and count (%) for categorical variables.

222

223 Primary statistical analyses will be performed using intention-to-treat basis. For the primary analysis, a  
224 mixed-effects model (MM) analysis will be performed using the data set without multiple imputation to compare the  
225 mean DASH scores. Treatment group and visits will be included as fixed factors and patient as a random factor. The  
226 model will include interactions between treatment and visit. Randomization stratification factors and baseline value  
227 will be included as covariates. The treatment effect will be quantified with an absolute difference between the groups  
228 in the DASH score with the associated 95% CI and p value at 12 months post-randomization.

228

229 The MM model will also be used to analyze secondary outcomes where applicable (pain-NRS at rest  
230 and during activities, 15D, CS). For categorical response variables, effects will be analyzed by logistic regression  
231 analysis with treatment as the fixed-factor covariate. These secondary outcomes will only be supportive, explanatory  
232 or hypothesis-generating (or both), which is why multiplicity is not considered to be a problem.

232

233 The adverse events of the study arms will be reported descriptively. If the number of events is large  
234 enough, an analysis between study arms will be performed.

234

235 All scale variables will be tested for normality with the Kolmogorov-Smirnov test. Variance of  
236 homogeneity will be tested using Levene's test. We consider a two-sided p value of 0.05 to indicate statistical  
237 significance.

237

238 We will perform secondary statistical analyses to identify potential effect-modifying and mediating  
239 factors. Potential effect-modifying factors to be tested with regression analyses are age, gender, body mass index,  
240 physical activity, smoking, level of education, fracture of dominant/non-dominant arm and position of the fracture.  
241 The absence of adverse effects and treatment attendance as intended will be analyzed as a potential effect-mediating  
242 factor.

242

243 We will also perform an on-treatment analysis if there are patients treated with a non-allocated  
244 method because patients declined the allocated treatment after the randomization, thus causing crossover in study  
245 arms. A medical reason to change treatment method, practically from conservative treatment to ORIF because of non-  
246 union or fracture threatening skin integrity in the early phase of treatment, will not be considered as a crossover.  
247 However, we will analyze such patients in a separate subgroup.

247

248 **3.2. Blinded Data Interpretation Protocol**

249

250 We used blinded data interpretation in analyzing the results of this trial.<sup>2</sup> The blinded data interpretation protocol was  
251 published in our protocol paper<sup>1</sup> as follows:

252

253 Before accessing the primary outcome data, the Writing Committee will record a 'Background assumptions'  
254 statement, which will contain our definition of MID of the outcome measures and a brief summary of the key  
255 statistical analysis used in the evaluation of the outcome data. The document will be signed by the members of the  
256 Writing Committee and published as an appendix to the primary publication. After this, the Writing Committee will  
257 write two interpretations of the trial results on the basis of a blinded review of the primary outcome data (treatment  
258 A compared with treatment B), with the assumption that A is the ORIF group and another assuming that A is the  
259 conservatively treated group. Decisions regarding the key analyses and presentation format for the primary  
260 publication before data analysis will also be decided in a meeting of the Writing Committee. The minutes of this  
261 meeting will be recorded as a statement of interpretation document, which will be signed by all members of the  
262 Writing Committee before the unsealing of the randomization.

262  
263  
264  
265  
266  
267  
268  
269  
270  
271  
272  
273  
274  
275  
276  
277  
278  
279  
280  
281  
282  
283  
284  
285  
286  
287  
288  
289  
290

### **3.3. Statistical Analysis Plan – Amendments**

The statistician doing the data analysis is using Stata version 15.1 (StataCorp LLC, Texas, USA) instead of IBM SPSS Statistics. We consider this a minor technical detail which does not affect the interpretation of our results.

Instead of Kolmogorov-Smirnov test for normality and Levene’s test for homogeneity, we will use other techniques, e.g., graphical evaluation.

All P values larger than 0.01 are be reported to two decimal places, and those between 0.01 and 0.001 to three decimal places; P values smaller than 0.001 are be reported as  $P < 0.001$ . We made this amendment since we did not state this in our protocol paper.

#### **Primary analysis – Amendments**

The primary comparison on the effectiveness of the treatment will be performed as a between-group comparison using a mixed-model repeated-measures analysis of variance (MMRM ANOVA). In the original analysis plan we used a term ‘MM model’ but changed the term to ‘MMRM ANOVA’ as it is more widely used term. We consider this only a terminological issue not affecting the analysis.

Study group and time of assessment (baseline, 6 weeks, 3, 6 and 12 months) were included as fixed factors, patient as a random factor. The model included interactions between study group and time of assessment. Change from baseline was estimated with baseline value as covariate. An unstructured covariance structure will be assumed. If the model cannot be fitted, compound symmetry will be assumed instead. The number of degrees of freedom will be assessed using Satterthwaite’s method. The MMRM model will be used to quantify the treatment effect as the absolute difference between the groups in DASH score with the associated 95% confidence interval (CI) and p-value at 12 months post-randomization.

The main publication with primary time point results was published in the JAMA 2020.

291 **4. STATISTICAL ANALYSIS PLAN – 2-YEAR RESULTS**

292

293

**4.1. Background**

294

295

296

297

298

299

300

301

302

303

304

**4.2. Statistical methods**

305

306

307

308

309

310

311

312

313

314

315

316

317

318

319

320

321

322

323

324

325

326

327

328

329

330

331

332

333

334

335

**4.3. Implementation of Analysis Plan**

336

337

338

339

340

341

342

343

344

345

The primary comparison showed no statistically significant between-group difference in the primary outcome, DASH, at 12 months after randomization. However, an important finding in the preplanned per protocol analysis of the 1-year results showed that the crossover group (patients allocated to bracing but who underwent secondary surgery to promote the healing of the fracture) had a statistically and clinically significant between-group difference in the primary outcome and most of the secondary outcomes compared to the surgery and the bracing group without crossovers. The recovery of these crossover patients after 12 months remained an important study question for the 2-year follow-up. Therefore, we planned the 2-year follow-up analyses to explore whether the crossover group reaches the outcome scores of the early surgery and the bracing group healing without subsequent intervention after the primary time point of 12 months.

Our statistical analysis plan at 2-year follow-up will be as follows:

The primary analysis method for this exploratory study will be per protocol analysis with three groups: initial surgery group, successful bracing group with no surgery during 2-year follow-up, and a secondary surgery group who had late surgery to promote the healing of the fracture during 2 years after randomization. In addition, we will carry out intention-to-treat analysis where the patients are analyzed according their randomization groups and an as-treated analysis where the patients are analyzed per latest treatment modality (surgery/nonoperative) at the different follow-up time points. The number of patients in surgery group increased in subsequent follow-up points as patients allocated to functional bracing were operated during the 2 years.

The comparison between the study groups will be performed using a mixed-model repeated-measures analysis of variance. Study group, study site, and time of assessment (baseline, 6 weeks, 3, 6 and 12 months, and 2 years) will be included as fixed factors, patients as random factors. The model includes interactions between study group and time of assessment. Change from baseline will be estimated with baseline value as covariate. The model will be used to quantify the treatment effect as the absolute difference between the groups in the primary outcome (DASH score, mean and 95% confidence interval [CI], and p-value) at 2 years after randomization. A similar model will be used to analyze secondary outcomes where applicable (pain-NRS at rest and during activities, 15D, Constant-Murley Score). For categorical response variables, effects will be analyzed using marginal logistic regression analysis.

Be it reiterated here that the primary comparison for 2-year follow-up (per protocol) will be different from the method of primary comparison at the primary time point of 12 months (intention-to-treat). The rationale behind this is that with this analysis we are primarily exploring whether the patients who underwent late surgery will reach the results of the patients with successful healing of the fracture with initially allocated treatment at 2 years. Because of the potential for type 1 error due to multiple comparisons, all findings for analyses of the 2-year follow-up should be interpreted as exploratory. The statistical model in the analyses allows missing data. No data will be thus imputed. Patients with at least some data can be included in the analyses.

An independent statistician will do all the analyses according to the preplanned statistical analysis plan. The threshold for statistical significance will be set at level 0.05 with 2-sided testing. The data will be analyzed using Stata version 15.1 with the “mixed” procedure (StataCorp LLC, Texas, USA).

This SAP will be used as a work description for the statistician performing the analyses. All analyses will be performed by the same statistician and none of the clinical investigators involved in this trial will perform any of the statistical analyses.

Results will be presented to the trial Writing Committee; any uncertainties will be clarified from the statistician. Blinded data interpretation is not used at 2 years as the number of patients in each of the study groups were revealed to the Writing Committee at 1-year.



346 Be it reiterated here that the statistical analysis plan for 2-year results was decided before having any results from the  
347 statistician.  
348

Helsinki, May 4, 2020

  
\_\_\_\_\_  
Lasse Rämö

  
\_\_\_\_\_  
Mika Paavola

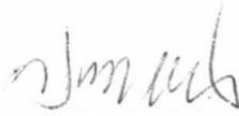  
\_\_\_\_\_  
Bakir O. Sumrein

  
\_\_\_\_\_  
Vesa Lepola

  
\_\_\_\_\_  
Tuomas Lähdeoja

  
\_\_\_\_\_  
Teppo Järvinen

  
\_\_\_\_\_  
Simo Taimela

349  
350  
351  
352  
353

354 **References**

355

356 1. Rämö L, Taimela S, Lepola V, Malmivaara A, Lähdeoja T, Paavola M. Open reduction and internal fixation of  
357 humeral shaft fractures versus conservative treatment with a functional brace: a study protocol of a randomised  
358 controlled trial embedded in a cohort. *BMJ Open*. 2017;7(7):e014076. doi:10.1136/bmjopen-2016-014076.

359 2. Järvinen TLN, Sihvonen R, Bhandari M, et al. Blinded interpretation of study results can feasibly and effectively  
360 diminish interpretation bias. *Journal of Clinical Epidemiology*. 2014;67(7):769-772.  
361 doi:10.1016/j.jclinepi.2013.11.011.

362
