# Supplementary material
Source: PubMed Central journal article supplement (PMC8047733)
Supplement: jamasurg-e210906-s003.pdf [file jamasurg-e210906-s003.pdf]

| <b>Group Name: The FISH Investigators</b> |                  |                             |                         |                                                                                       |                                                 |                                                                |                                                                                                   |
|-------------------------------------------|------------------|-----------------------------|-------------------------|---------------------------------------------------------------------------------------|-------------------------------------------------|----------------------------------------------------------------|---------------------------------------------------------------------------------------------------|
| <b>First Name and Middle Initial(s)</b>   | <b>Last Name</b> | <b>Suffix (eg, Jr, III)</b> | <b>Academic Degrees</b> | <b>Institution</b>                                                                    | <b>Location (city, state/province, country)</b> | <b>Role or Contribution, eg, chair, principal investigator</b> | <b>Group (if more than 1 Group listed in the byline) and/or Subgroup (eg, Steering Committee)</b> |
| Mikko T                                   | Salmela          |                             | MD, PhD                 | Orthopedics and Traumatology, University of Helsinki and Helsinki University Hospital | Helsinki, Finland                               | Site investigator, Helsinki, Finland                           |                                                                                                   |
| Miia                                      | Mäntysaari       |                             | MD                      | Orthopedics and Traumatology, University of Helsinki and Helsinki University Hospital | Helsinki, Finland                               | Site investigator, Helsinki, Finland                           |                                                                                                   |
| Thomas                                    | Ibounig          |                             | MD                      | Orthopedics and Traumatology, University of Helsinki and Helsinki University Hospital | Helsinki, Finland                               | Site investigator, Helsinki, Finland                           |                                                                                                   |
| Robert                                    | Björkenheim      |                             | MD                      | Orthopedics and Traumatology, University of Helsinki and Helsinki University Hospital | Helsinki, Finland                               | Site investigator, Helsinki, Finland                           |                                                                                                   |
| Eerik                                     | Hällfors         |                             | MD                      | Orthopedics and Traumatology, University of Helsinki and Helsinki University Hospital | Helsinki, Finland                               | Site investigator, Helsinki, Finland                           |                                                                                                   |
| Antti P                                   | Launonen         |                             | MD, PhD                 | Orthopedics and Traumatology, University of Tampere and Tampere University Hospital   | Tampere, Finland                                | Site investigator, Tampere, Finland                            |                                                                                                   |
| Antti                                     | Riuttanen        |                             | MD                      | Orthopedics and Traumatology, University of Tampere and Tampere University Hospital   | Tampere, Finland                                | Site investigator, Tampere, Finland                            |                                                                                                   |
| Leena                                     | Caravitis        |                             | PT                      | Helsinki University Hospital                                                          | Helsinki, Finland                               | Research Nurse                                                 |                                                                                                   |
| Seija                                     | Rautiainen       |                             | RN                      | Tampere University Hospital                                                           | Tampere, Finland                                | Research Nurse                                                 |                                                                                                   |
| Pasi                                      | Aronen           |                             | MSocSc                  | Helsinki University Hospital                                                          | Helsinki, Finland                               | Co-statistician                                                |                                                                                                   |
| Antti                                     | Malmivaara       |                             | MD, PhD                 | National Institute for Health and Welfare                                             | Helsinki, Finland                               | Study Concept and Design                                       |                                                                                                   |
