# Supplementary material
Source: PubMed Central journal article supplement (PMC8047733)
Supplement: jamasurg-e210906-s004.pdf [file jamasurg-e210906-s004.pdf]

## Data Sharing Statement

Rämö. Outcomes With Surgery vs Functional Bracing for Patients With Closed, Displaced Humeral Shaft Fractures and the Need for Secondary Surgery. *JAMA Surg*. Published April 14, 2021.  
doi:10.1001/jamasurg.2021.0906

### Data

**Data available:** Yes

**Data types:** Deidentified participant data, Data dictionary

**How to access data:** Data will be provided on reasonable request to corresponding author Lasse Rämö ([lasse.ramo@hus.fi](mailto:lasse.ramo@hus.fi))

**When available:** With publication

### Supporting Documents

**Document types:** Informed consent form

**How to access documents:** Supporting documents will be provided on reasonable request to corresponding author Lasse Rämö ([lasse.ramo@hus.fi](mailto:lasse.ramo@hus.fi))

**When available:** With publication

### Additional Information

**Who can access the data:** researchers whose proposed use of the data has been approved

**Types of analyses:** meta-analysis

**Mechanisms of data availability:** with investigator support after approval of a proposal
